# Supplementary material for: Disentangling magnetic core/shell morphologies in Co-based nanoparticles
Source: Royal Society of Chemistry journal article supplement (doi:10.1039/c6tc00540c), 2016-01-01
Supplement: c6tc00540c1.pdf [file c6tc00540c1.pdf]

SUPPLEMENTARY INFORMATION

**Disentangling magnetic core/shell morphologies in Co-based nanoparticles**

Natalia Rinaldi-Montes,<sup>\*,a</sup> Pedro Gorria,<sup>b</sup> David Martínez-Blanco,<sup>c</sup> Zakariae Amghouz,<sup>c</sup> Antonio B. Fuertes,<sup>d</sup> Luis Fernández Barquín,<sup>e</sup> Jesús Rodríguez Fernández,<sup>e</sup> Luca Olivi,<sup>f</sup> Guiliana Aquilanti,<sup>f</sup> and Jesús A. Blanco<sup>a</sup>

<sup>a</sup>Departamento de Física, Universidad de Oviedo, E-33007 Oviedo, Spain

<sup>b</sup>Departamento de Física & IUTA, EPI, Universidad de Oviedo, E-33203 Gijón, Spain

<sup>c</sup>Servicios Científico-Técnicos, Universidad de Oviedo, E-33006 Oviedo, Spain

<sup>d</sup>Instituto Nacional del Carbón (CSIC), E-33080 Oviedo, Spain

<sup>e</sup>CITIMAC, Facultad de Ciencias, Universidad de Cantabria, E-39005 Santander, Spain

<sup>f</sup>Eletra-Sincrotrone Trieste S.C.p.A., 34149 Basovizza, Trieste, Italy

Corresponding author E-mail: nataliarin@gmail.com

## 1. Size distribution of the nanoparticles

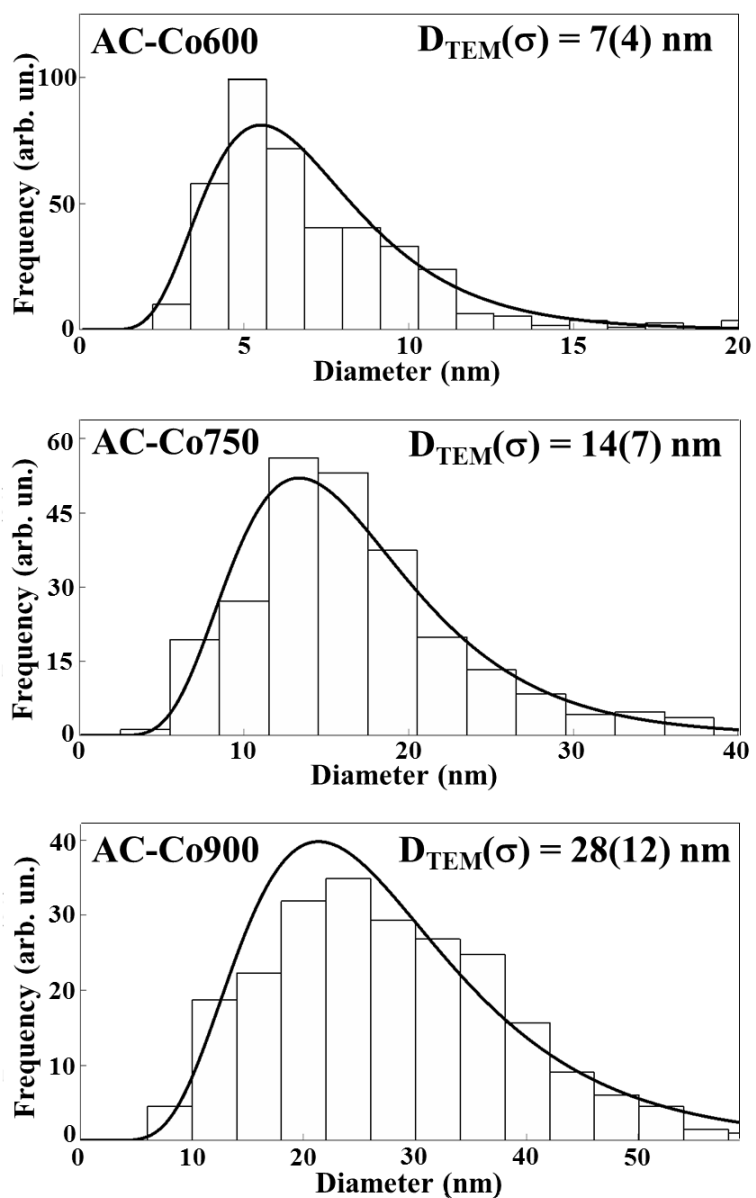

**Figure S1.** Histograms of the particle size distributions of the samples together with log-normal fits, providing mean NP diameters ( $D$ ) and standard deviations ( $\sigma$ ).

## 2. Zero-field-cooling and field-cooling magnetization curves

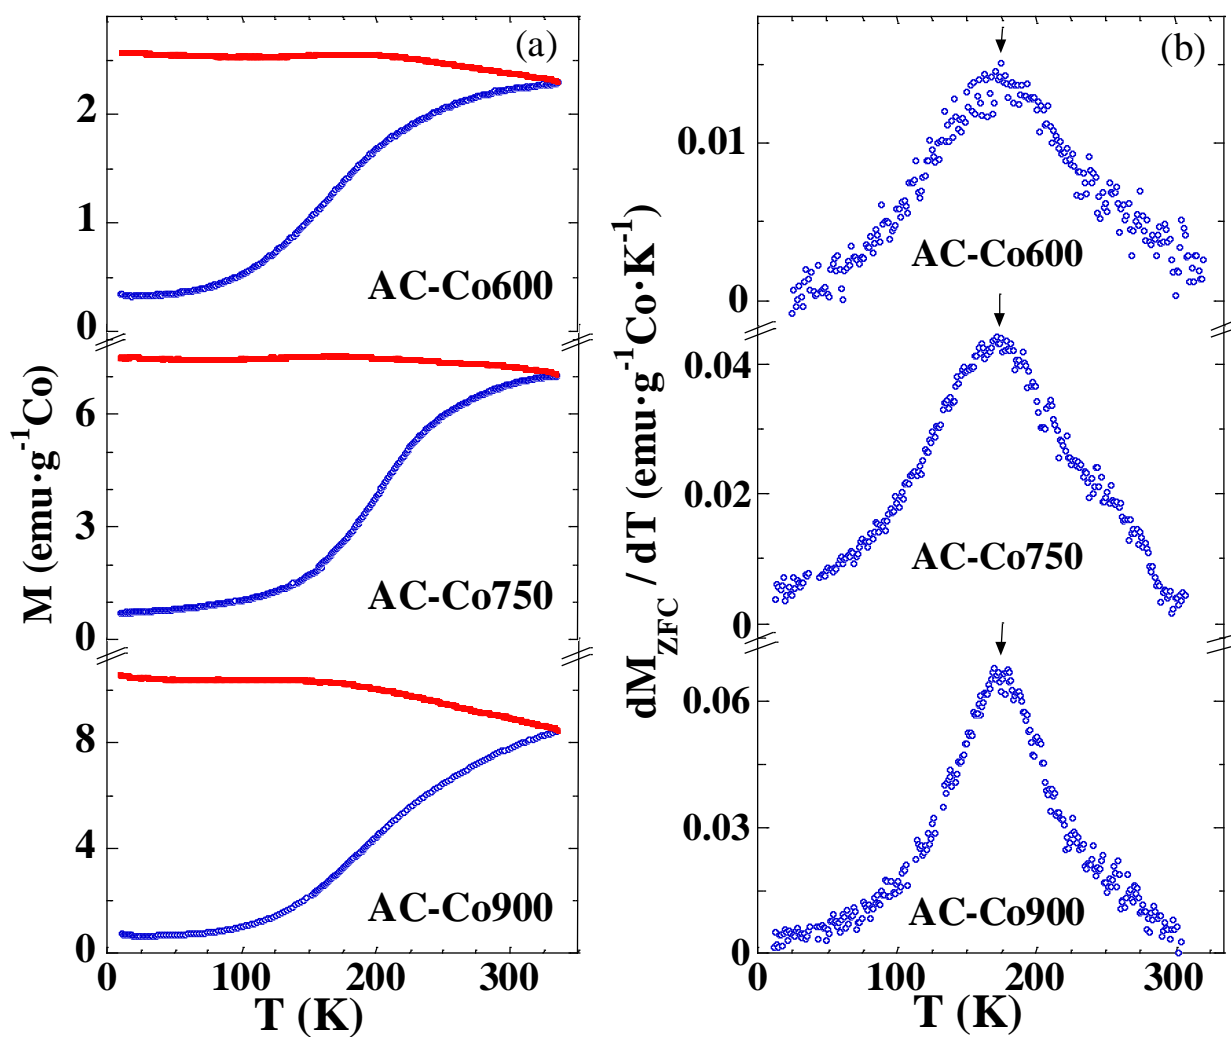

**Figure S2.** (a) ZFC (blue) and FC (red) magnetization curves for samples AC-Co600 (top), AC-Co750 (middle) and AC-Co900 (bottom), measured under an applied magnetic field of 100 Oe. (b) Temperature derivatives of the ZFC magnetization curves ( $dM_{\text{ZFC}}/dT$ ).
